# Supplementary material
Source: PubMed Central journal article supplement (PMC1617177)

## Electronic appendix

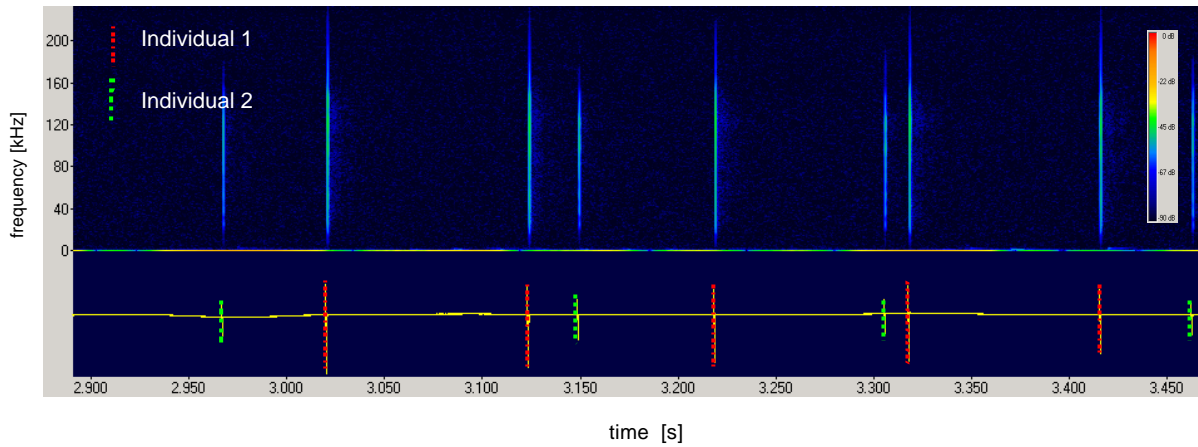

Section of a recording sequence showing two individuals echolocating during asynchronous travel. The sonogram (FFT 1024, overlap 40 %) only shows the overview mode, power spectra and exact waveforms were compared separately in a special analysis mode.

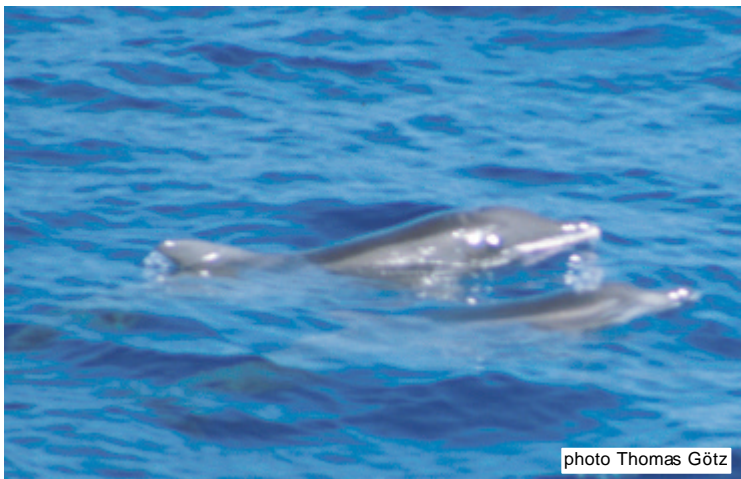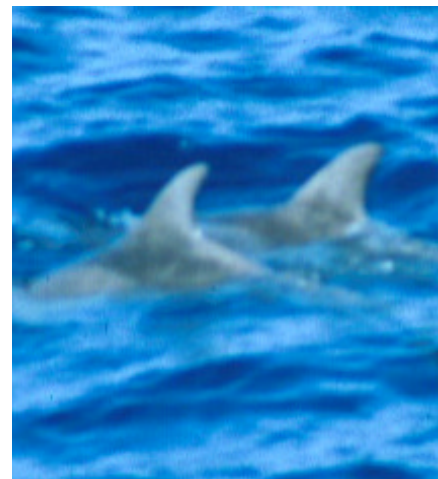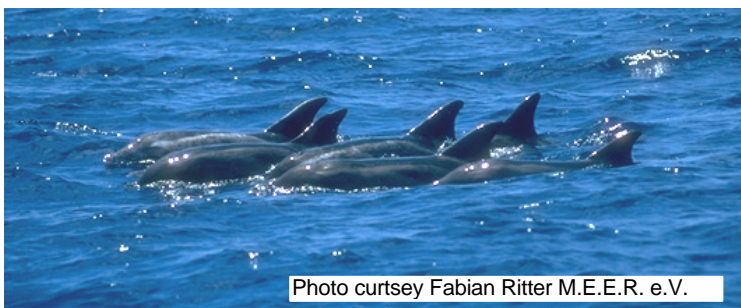

Synchronized travelling behaviour in subgroups of different size.

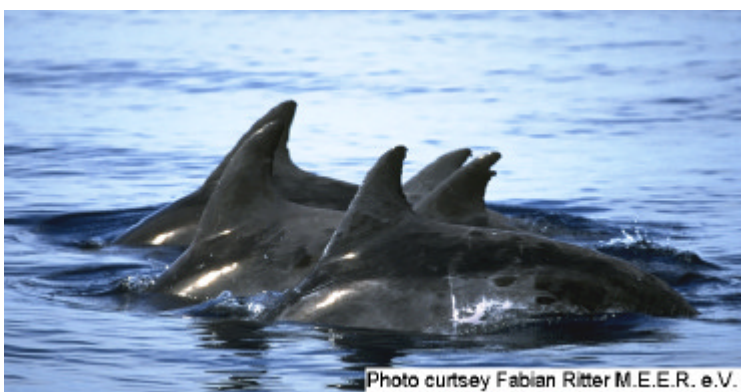

Supplement: rsbl20050407s02.pdf [file rsbl20050407s02.pdf]
